# Supplementary material for: The cryo-EM structure of the human uromodulin filament core reveals a unique assembly mechanism
Source: eLife journal article supplement (doi:10.7554/elife.60265), 2020-08-20
Supplement: supp [file elife-60265-supp-v1.zip]

## Supplementary file 1A

| Table S1: UMOD ZP module residues from the interfaces I <sub>A</sub> , I <sub>B</sub> , or the linker region in the filament core and their gnomAD variants |          |                 |                    |  |
|-------------------------------------------------------------------------------------------------------------------------------------------------------------|----------|-----------------|--------------------|--|
| UMOD Domain                                                                                                                                                 | Position | Interface/CS    | Variant Amino Acid |  |
| ZPN                                                                                                                                                         | Y402     | A               | -                  |  |
| ZPN                                                                                                                                                         | Y407     | B               | -                  |  |
| ZPN                                                                                                                                                         | I413     | B               | L                  |  |
| ZPN                                                                                                                                                         | I414     | B               | -                  |  |
| ZPN                                                                                                                                                         | R415     | B               | C, H               |  |
| ZPN                                                                                                                                                         | Y427     | A               | -                  |  |
| Linker                                                                                                                                                      | L429     | A               | M                  |  |
| Linker                                                                                                                                                      | D430     | CS <sub>A</sub> | N                  |  |
| Linker                                                                                                                                                      | M431     | CS <sub>A</sub> | V                  |  |
| Linker                                                                                                                                                      | K432     | CS <sub>A</sub> | -                  |  |
| Linker                                                                                                                                                      | V433     | CS <sub>A</sub> | I                  |  |
| Linker                                                                                                                                                      | S434     | CS <sub>A</sub> | -                  |  |
| Linker                                                                                                                                                      | L435     | CS <sub>A</sub> | -                  |  |
| Linker                                                                                                                                                      | K436     | CS <sub>A</sub> | -                  |  |
| Linker                                                                                                                                                      | T437     | CS <sub>A</sub> | S                  |  |
| Linker                                                                                                                                                      | A438     | CS <sub>A</sub> | S                  |  |
| Linker                                                                                                                                                      | L439     | CS <sub>A</sub> | -                  |  |
| Linker                                                                                                                                                      | Q440     | CS <sub>A</sub> | E, H               |  |
| Linker                                                                                                                                                      | P441     | B               | -                  |  |
| Linker                                                                                                                                                      | M442     | B               | -                  |  |
| Linker                                                                                                                                                      | V443     | B               | -                  |  |
| Linker                                                                                                                                                      | S444     | B               | T                  |  |
| Linker                                                                                                                                                      | A445     | CS <sub>B</sub> | V                  |  |
| Linker                                                                                                                                                      | L446     | CS <sub>B</sub> | V                  |  |
| Linker                                                                                                                                                      | N447     | CS <sub>B</sub> | -                  |  |
| Linker                                                                                                                                                      | I448     | CS <sub>B</sub> | -                  |  |
| Linker                                                                                                                                                      | R449     | CS <sub>B</sub> | -                  |  |
| Linker                                                                                                                                                      | V450     | CS <sub>B</sub> | -                  |  |
| Linker                                                                                                                                                      | G451     | CS <sub>B</sub> | -                  |  |
| Linker                                                                                                                                                      | G452     | CS <sub>B</sub> | R                  |  |
| Linker                                                                                                                                                      | T453     | CS <sub>B</sub> | -                  |  |
| Linker                                                                                                                                                      | G454     | A               | S                  |  |
| Linker                                                                                                                                                      | M455     | A               | -                  |  |
| Linker                                                                                                                                                      | F456     | A               | -                  |  |
| ZPC                                                                                                                                                         | L491     | A               | -                  |  |
| ZPC                                                                                                                                                         | F499     | A               | L                  |  |
| ZPC                                                                                                                                                         | Y520     | B               | -                  |  |
| ZPC                                                                                                                                                         | D532     | B               | Y                  |  |
| ZPC                                                                                                                                                         | F553     | B               | -                  |  |
| ZPC                                                                                                                                                         | R554     | B               | W, Q               |  |
| ZPC                                                                                                                                                         | F555     | B               | -                  |  |
| ZPC                                                                                                                                                         | Y559     | B               | D                  |  |
| ZPC                                                                                                                                                         | D560     | B               | E                  |  |
| ZPC                                                                                                                                                         | L570     | A               | -                  |  |
| CCS                                                                                                                                                         | R586     | -               | -                  |  |
| CTP                                                                                                                                                         | L599     | CTP/ZPC         | -                  |  |
| CTP                                                                                                                                                         | L601     | CTP/ZPC         | F                  |  |
| CTP                                                                                                                                                         | I604     | CTP/ZPC         | -                  |  |

### ZP module linker and interface amino acid positions with known variants (gnomAD).

Amino acid variants for each amino acid present in the linker region or at either I<sub>A</sub> or I<sub>B</sub> are listed, according to the gnomAD database. CCS = consensus cut site for hepsin.

## Supplementary file 1B

|                                                      | Session 1                                                          | Session 2            |
|------------------------------------------------------|--------------------------------------------------------------------|----------------------|
| Microscope and camera                                | Titan Krios (Thermo Fisher Scientific), Cs=2.7 mm; Gatan K2 Summit |                      |
| Magnification                                        | 130 000                                                            |                      |
| Voltage (kV)                                         | 300                                                                |                      |
| Data acquisition software                            | EPU                                                                |                      |
| Exposure navigation                                  | Image shift                                                        |                      |
| Collected movies                                     | 4679                                                               | 4864                 |
| Electron exposure                                    | 45                                                                 |                      |
| Defocus range ( $\mu\text{m}$ )                      | -1.2 to -3.3                                                       | -0.8 to -2           |
| Number of frames                                     | 40                                                                 | 40                   |
| Electron dose ( $\text{e}^-/\text{\AA}^2/\text{s}$ ) | 7.5                                                                | 7.5                  |
| Exposure time (s)                                    | 6                                                                  |                      |
| Pixel size ( $\text{\AA}$ )                          | 1.084                                                              | 1.084                |
| <b>Refinement</b>                                    | UMOD (EMD: 11388,<br>PDB: 6ZS5)                                    | UMOD (EMD: 11389)    |
| Software used                                        | cryoSPARC 2 v2.15                                                  | cisTEM 1.0.0 beta    |
| Symmetry imposed                                     | C1                                                                 |                      |
| Picking method                                       | Topaz                                                              | Manual picking       |
| Initial particle images (no.)                        | 1.31 M                                                             | 485 k                |
| Final particle images (no.)                          | 145 k                                                              | 330 k                |
| Map resolution ( $\text{\AA}$ )                      | 3.47                                                               | 4.60                 |
| FSC threshold                                        | 0.143                                                              |                      |
| Map resolution range ( $\text{\AA}$ )                | 3.2-7.2                                                            | 4.4-5.5              |
| <b>Model statistics</b>                              | UMOD AU (6ZS5)                                                     | Extended UMOD (6ZYA) |
| Model resolution ( $\text{\AA}$ )                    | 3.99                                                               |                      |
| FSC threshold                                        | 0.5                                                                |                      |
| Map sharpening B factor ( $\text{\AA}^2$ )           | -99.9                                                              |                      |
| <b>Model Composition</b>                             |                                                                    |                      |
| Total atoms                                          | 2036                                                               | 6114                 |
| Protein residues                                     | 257                                                                | 772                  |
| Mean B factor protein ( $\text{\AA}^2$ )             | 78.79                                                              | 234.35               |
| Mean B factor ligand ( $\text{\AA}^2$ )              | 130.15                                                             | 280.53               |
| <b>R.m.s. deviations</b>                             |                                                                    |                      |
| Bond lengths ( $\text{\AA}$ )                        | 0.008                                                              | 0.015                |
| Bond angles ( $^\circ$ )                             | 1.214                                                              | 1.394                |
| Validation                                           |                                                                    |                      |
| MolProbity score                                     | 1.52                                                               | 1.75                 |
| Clashscore                                           | 4.02                                                               | 7.78                 |
| Rotamer outliers (%)                                 | 0.0                                                                | 0.0                  |
| <b>Ramachandran plot<sup>1</sup></b>                 |                                                                    |                      |
| Favored (%)                                          | 95.26                                                              | 95.29                |
| Allowed (%)                                          | 4.74                                                               | 4.71                 |
| Disallowed (%)                                       | 0                                                                  | 0                    |

### Cryo-EM data collection and model refinement statistics.

<sup>1</sup>Ramachandran restraints were used during the refinement.

# Supplementary file 1C

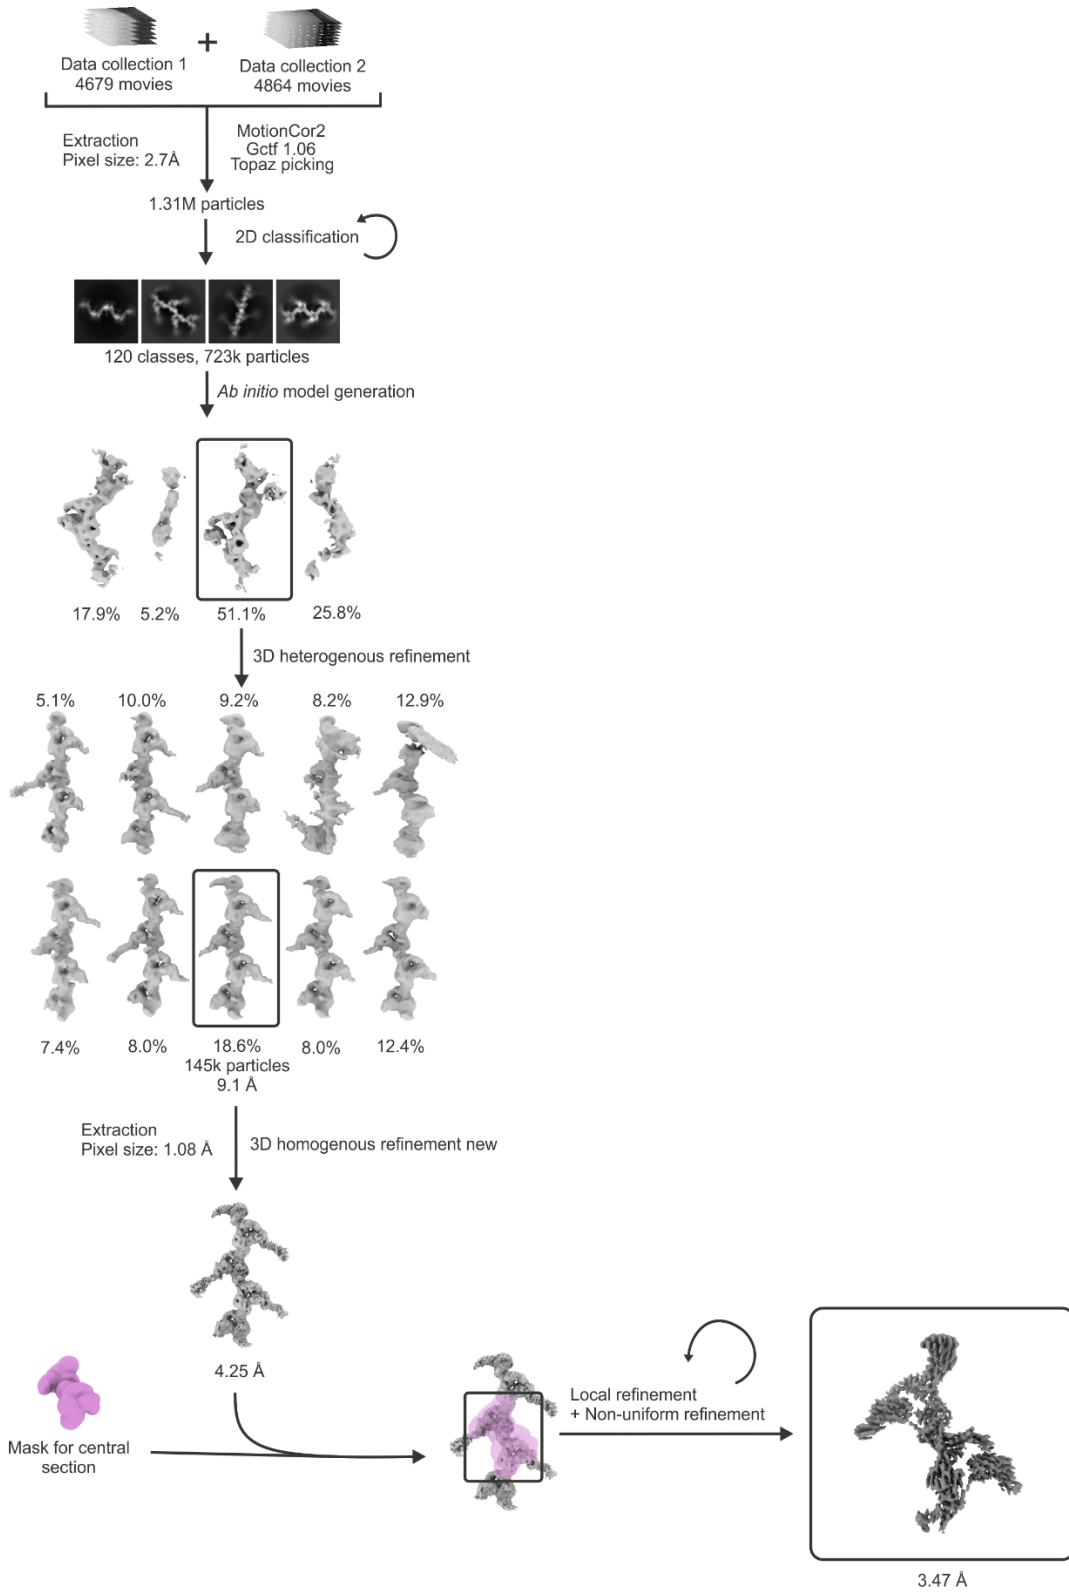

Flowchart for cryoSPARC cryo-EM processing.

## Supplementary file 1D

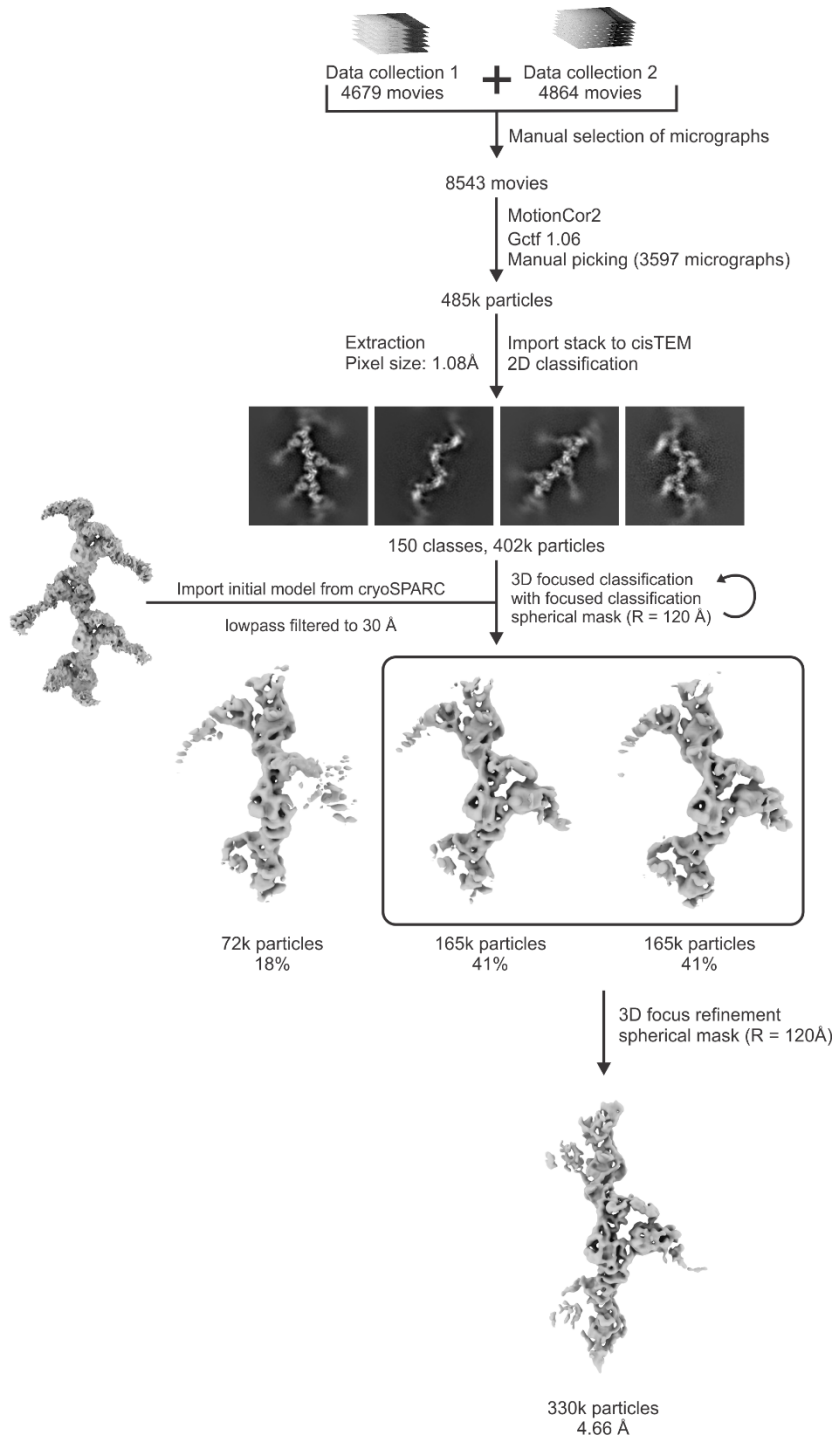

Flowchart for cisTEM cryo-EM processing.
