# Supplementary material for: The cryo-EM structure of the human uromodulin filament core reveals a unique assembly mechanism
Source: eLife journal article supplement (doi:10.7554/elife.60265), 2020-08-20
Supplement: supp [file elife-60265-supp-v1.zip]

**ZPN**

0 substitutions: 49%  
1 substitution: 37%  
2 substitutions: 12%

**Linker**

0 substitutions: 58%  
1 substitution: 25%  
2 substitutions: 14%

**ZPC**

0 substitutions: 51%  
1 substitution: 38%  
2 substitutions: 11%

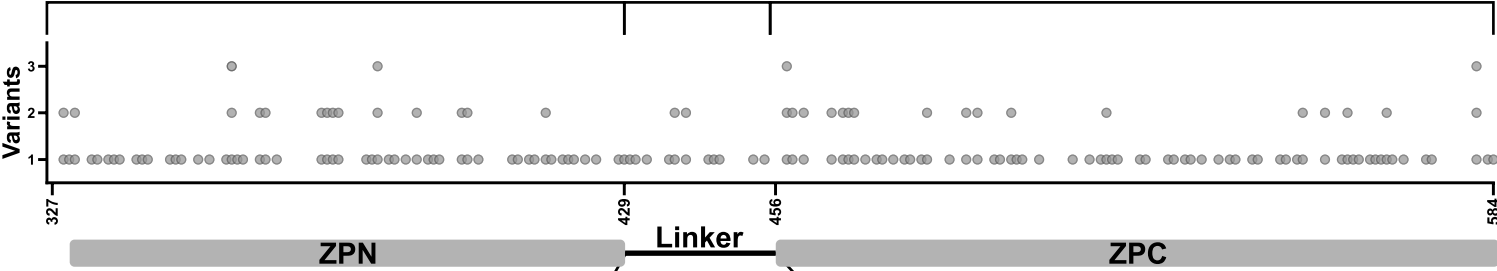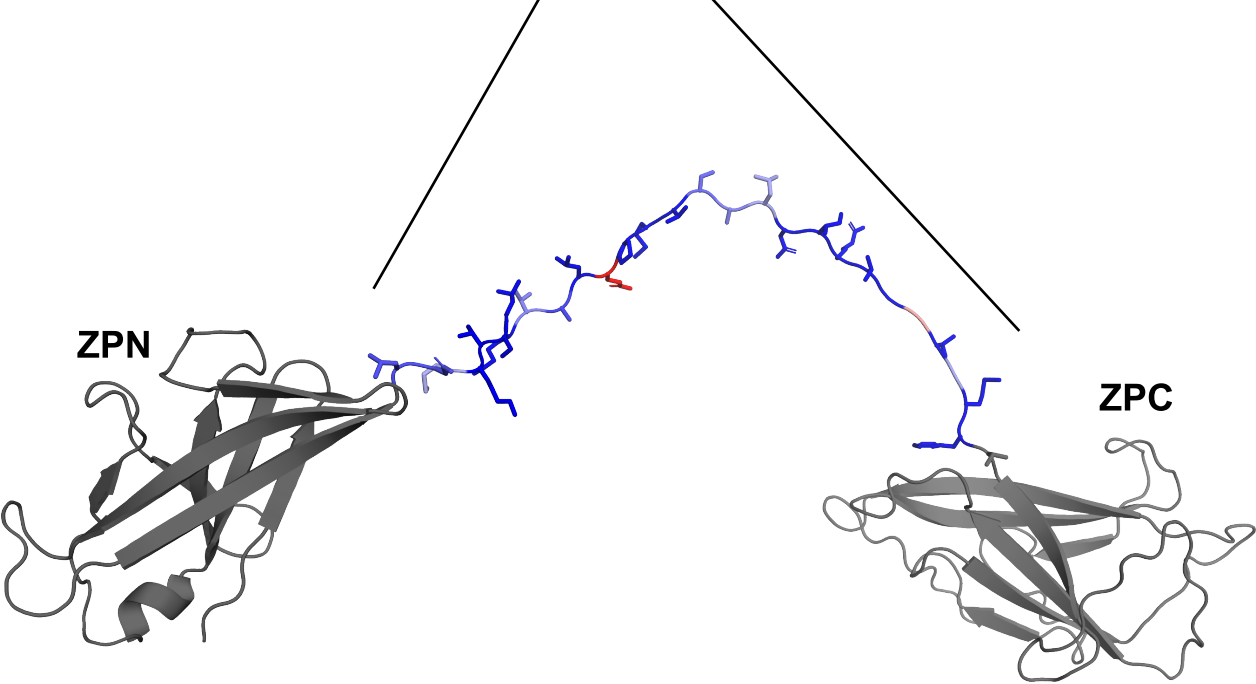

429-LDMKVSLKTA**LQ**PMVSALNIRVG**GT**GMF-456

Number of variants: 1 1 1 -1 - - - 1 2 -2 - - - 1 1 1 - - - - 1 -1 - -
