# Supplementary material for: The cryo-EM structure of the human uromodulin filament core reveals a unique assembly mechanism
Source: eLife journal article supplement (doi:10.7554/elife.60265), 2020-08-20
Supplement: supp [file elife-60265-supp-v1.zip]

UROM\_HUMAN

GP2\_HUMAN

TECTA\_HUMAN

EGLN\_HUMAN

328

L - - L E H R L E C G A N D M K V S L G K C Q L K S L G F D - K V F M Y L S D S R C S G F N D R D N R D W V S V V T P A R D G P C G T V L T R N E T H A T Y S N T L

406

222

S - - L Q P Q L D C G P R E I K V K V D K C L L G G L G L G E E V I A Y L R D P N C S S I L Q T E E R N W V S V T S P V Q A S A C R N I L E R N Q T H A I Y K N T L

301

1799

I - - I D A E V T C K A A Q M E V S I S K C K L F Q L G F E R E G - V R I N D R Q C T G I E - - G E D F I S F Q I N N T K G N C G N I V Q S N G T H I M Y K N T L

1874

354

L L M S L I Q T K C A D D A M T L V L K K E L V A H L K C T I T G - L T F W D P S C E A E D R - - G D K F - - - V L R S A Y S S C G M Q V S A S - - - - M I S N E A

425

Linker

UROM\_HUMAN

GP2\_HUMAN

TECTA\_HUMAN

EGLN\_HUMAN

407

Y L A - - - - D E I I I R D L N I K I N F A C S Y P L D M K V S L K T A L Q P M V S A L N I R V G - G T G M F T V R M A L F Q T P S Y T - - - - - Q P Y Q G S S

476

302

S L V - - - - N D F I I R D T I L N I N F Q C A Y P L D M K V S L Q A A L Q P I V S S L N V S V D - G N G E F I V R M A L F Q D Q N Y T - - - - - N P Y G D A

371

1875

W I E S A N N T G N I I T R D R T I N V E F S C A Y E L D I K I S L D S V V K P M L S V I N L T V P T Q E G S F I T K M A L Y K N A S Y K - - - - - H P Y R Q G E

1950

426

- - - - - V V N I L S S S S P Q R K K V H C L N M - - - - - D S L S F Q L G L Y L S P H F L Q A S N T I E P G Q Q S F

474

UROM\_HUMAN

GP2\_HUMAN

TECTA\_HUMAN

EGLN\_HUMAN

477

V T L S T E A F L Y V G T M L D G G D L S R F A L L M T N C Y A T P S - - S N A T D P L K Y F I I Q D R C P H T R D S T I Q V V E N G E S S Q G R F S V Q M F R F A

556

372

V E L S V E S V L Y V G A I L E Q G D T S R F N L V L R N C Y A T P T - - E D K A D L V K Y F I I R N S C S N Q R D S T I H V E E N G Q S S E S R F S V Q M F M F A

451

1951

V V L T T R D V L Y V G V F V V G A D A T H L I L T L N K C Y A T P T - - R D S N D K L R Y F I I E G G C Q N L K D N T I G I E E N A V S L T C R F H V T V F K F I

2030

475

V Q V - - - - - R V S P S V S E F L L Q L D S C H L D L G P E G G T V E L I Q G R A A K G N C V S L - - - - - L S P S P E G D P R F S - - - - - F L

533

UROM\_HUMAN

GP2\_HUMAN

TECTA\_HUMAN

EGLN\_HUMAN

557

G N Y D L V - - - - - Y L H C E V Y L C D T M N E K C K P T C S G T - R F R

452

G H Y D L V - - - - - F L H C E I H L C D S L N E Q C Q P S C S R S - Q V R

2031

G D Y D E V - - - - - H L H C A V S L C D S E K Y S C K I T C P H N S R I A

534

L H F Y T V P I P K T G T L S C T V A L R P - - - - - K
