# Supplementary material for: The cryo-EM structure of the human uromodulin filament core reveals a unique assembly mechanism
Source: eLife journal article supplement (doi:10.7554/elife.60265), 2020-08-20
Supplement: supp [file elife-60265-supp-v1.zip]

|            |            |        |   |   |   |   |   |   |   |   |   |   |   |   |   |   |   |   |   |   |   |   |   |   |   |   |   |   |   |   |   |   |   |   |   |   |   |   |   |   |   |   |   |   |   |   |   |   |   |   |   |   |   |   |   |   |   |   |   |   |   |   |   |   |   |
|------------|------------|--------|---|---|---|---|---|---|---|---|---|---|---|---|---|---|---|---|---|---|---|---|---|---|---|---|---|---|---|---|---|---|---|---|---|---|---|---|---|---|---|---|---|---|---|---|---|---|---|---|---|---|---|---|---|---|---|---|---|---|---|---|---|---|---|
| MGQPSLTWML | MVVVASWFIT | TAA    | T | D | T | S | E | A | R | W | C | S | E | C | H | S | N | A | T | C | T | E | D | E | A | V | T | T | C | T | C | Q | E | G | F | T | G | D | G | L | T | C | V | D | L | D | E | C | A | I | P | G | A | H | N | C | S | A | N |   |   |   |   |   |   |
| SSCVNTPGSF | SCVCPEGFRL | SPGL   | G | C | T | D | V | D | E | C | A | E | P | G | L | S | H | C | H | A | L | A | T | C | V | N | V | V | G | S | Y | L | C | V | C | P | A | G | Y | R | G | D | G | W | H | C | E | C | S | P | G | S | C | G | P | G | L | D |   |   |   |   |   |   |   |
| CVPEGDALVC | ADFCQAHRTL | DEYWR  | S | T | E | Y | G | E | G | Y | A | C | D | T | D | L | R | G | W | Y | R | F | V | G | Q | Q | G | G | A | R | M | A | E | T | C | V | P | V | L | R | C | N | T | A | A | P | M | W | L | N | G | T | H | P | S | S | D | E |   |   |   |   |   |   |   |
| GIVSRKACAH | WSGHCCLDWA | SVQVK  | A | C | A | G | G | Y | Y | V | Y | N | L | T | A | P | P | E | C | H | L | A | Y | C | T | D | P | S | S | V | E | G | T | C | E | E | C | S | I | D | E | D | C | K | S | N | N | G | R | W | H | C | Q | C | K | Q | D |   |   |   |   |   |   |   |   |
| FNITDISLLE | HRLECGANDM | KVSLGK | C | Q | L | K | S | L | G | F | D | K | V | F | M | Y | L | S | D | S | R | C | S | G | F | N | D | R | D | N | R | D | W | V | S | V | V | T | P | A | R | D | G | P | C | G | T | V | L | T | R | N | E | T | H | A |   |   |   |   |   |   |   |   |   |
| TYSNTLYLAD | EIIIRD     | L      | N | I | K | I | N | F | A | C | S | Y | P | L | D | M | K | V | S | L | K | T | A | L | Q | P | M | V | S | A | L | N | I | R | V | G | G | T | G | M | F | T | V | R | M | A | L | F | Q | T | P | S | Y | T | Q | P | Y | Q | G | S | S | V | T | L | S |
| TEAFLYVGTM | LDGGDL     | S      | R | F | A | L | L | M | T | N | C | Y | A | T | P | S | S | N | A | T | D | P | L | K | Y | F | I | I | Q | D | R | C | P | H | T | R | D | S | T | I | Q | V | V | E | N | G | E | S | S | Q | G | R | F | S | V | Q | M | F | R | F | A | G | N | Y | D |
| LVYLHCEVYL | CDTMNEK    | C      | K | P | T | C | S | G | T | R | F | R | S | G | S | V | I | D | Q | S | R | V | L | N | L | G | P | I | T | R | K | G | V | Q | A | T | V | S | R | A | F | S | S | L | G | L | L | K | V | W | L | P | L | L | L | S | A | T | L | T | L | T | F | Q |   |

↑
