# Supplementary figures and images for: The cryo-EM structure of the human uromodulin filament core reveals a unique assembly mechanism
Source: eLife journal article supplement (doi:10.7554/elife.60265), 2020-08-20

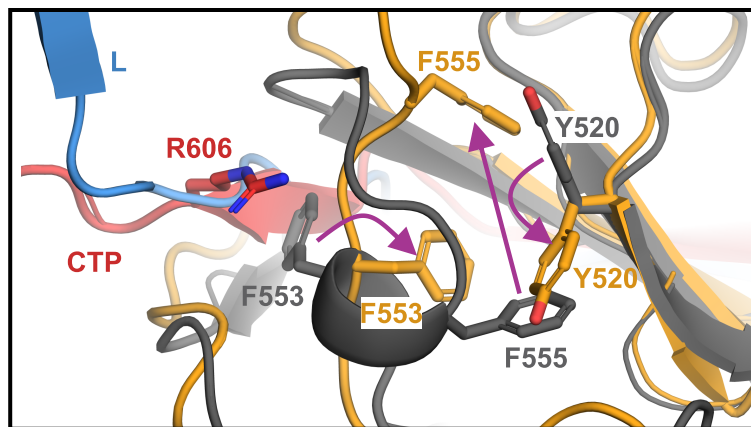

rEGF-ZP-CTP

cryo-EM ZPC

I<sub>B</sub>

Supplement: supp [file elife-60265-supp-v1.zip]

**A**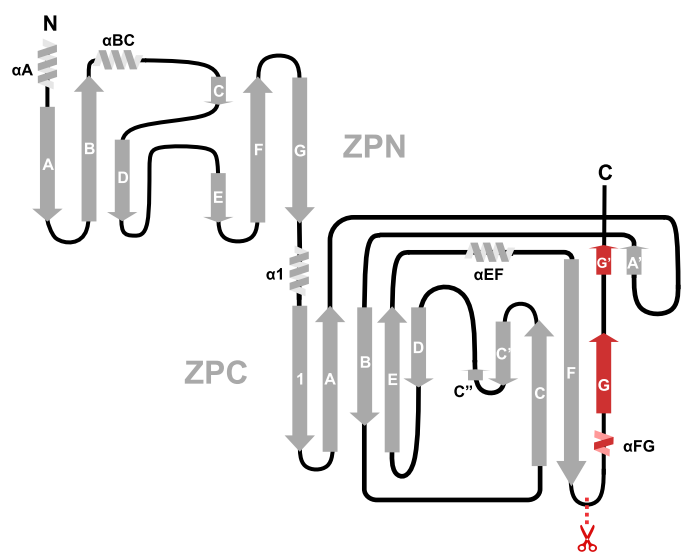

**Crystal Structure (4WRN)  
rEGF-ZP-CTP**

**B**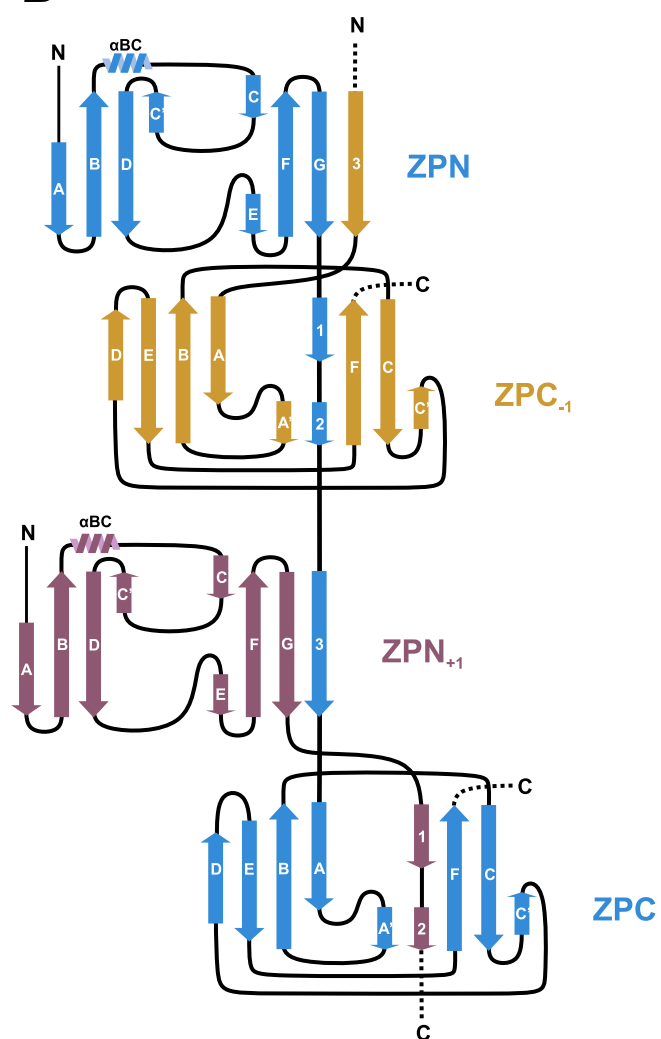

**Native UMOD Filament**

Supplement: supp [file elife-60265-supp-v1.zip]

**A**Fiber polarity  
↓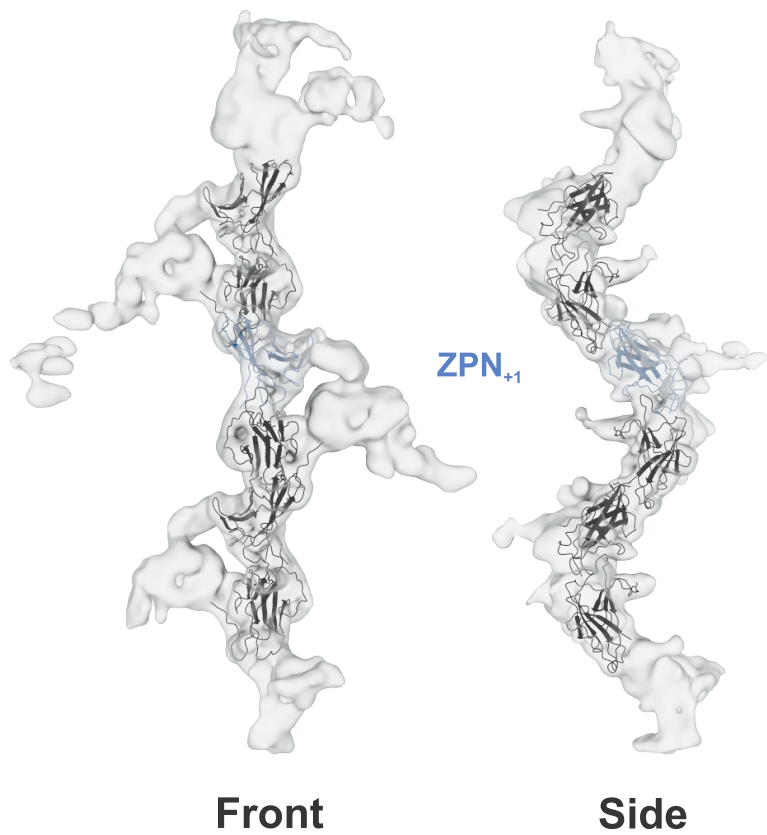**B**Fiber polarity  
←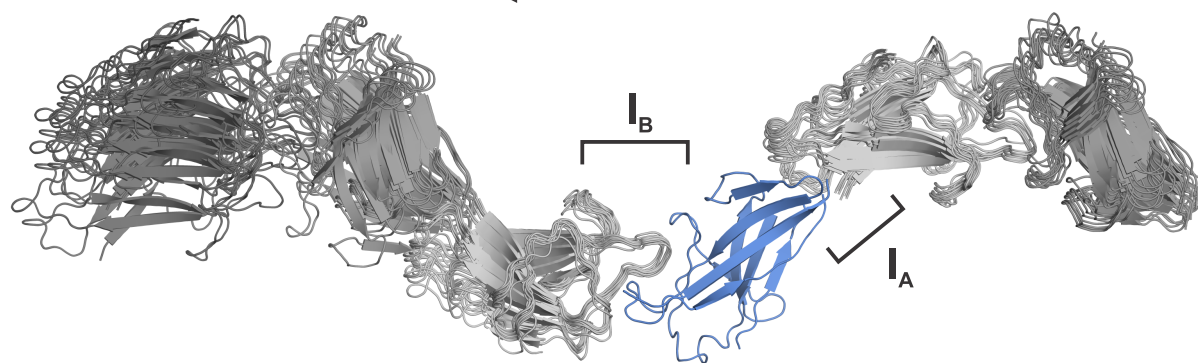**C**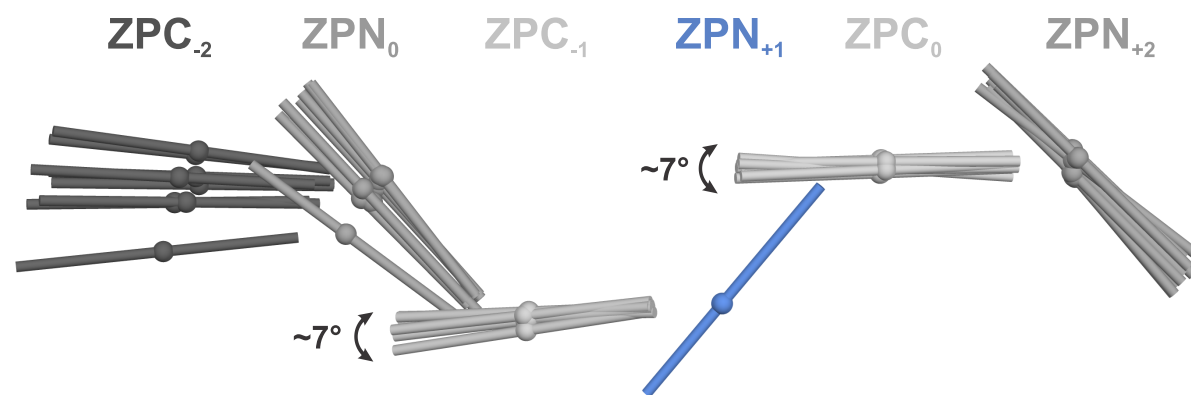

Supplement: supp [file elife-60265-supp-v1.zip]

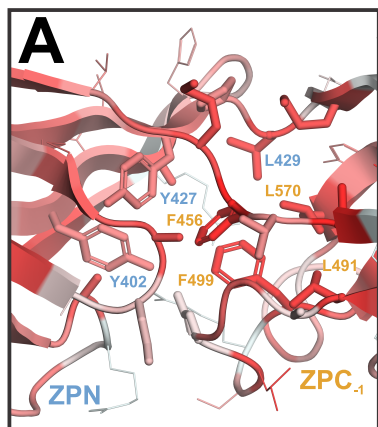

**I<sub>A</sub>**

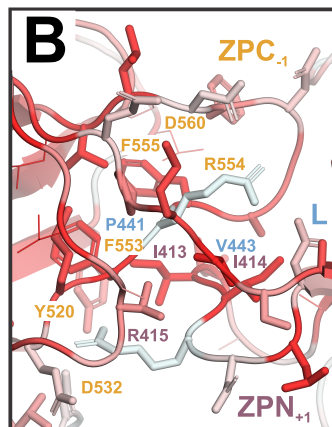

**I<sub>B</sub>**

Supplement: supp [file elife-60265-supp-v1.zip]

ZPC<sub>1</sub>

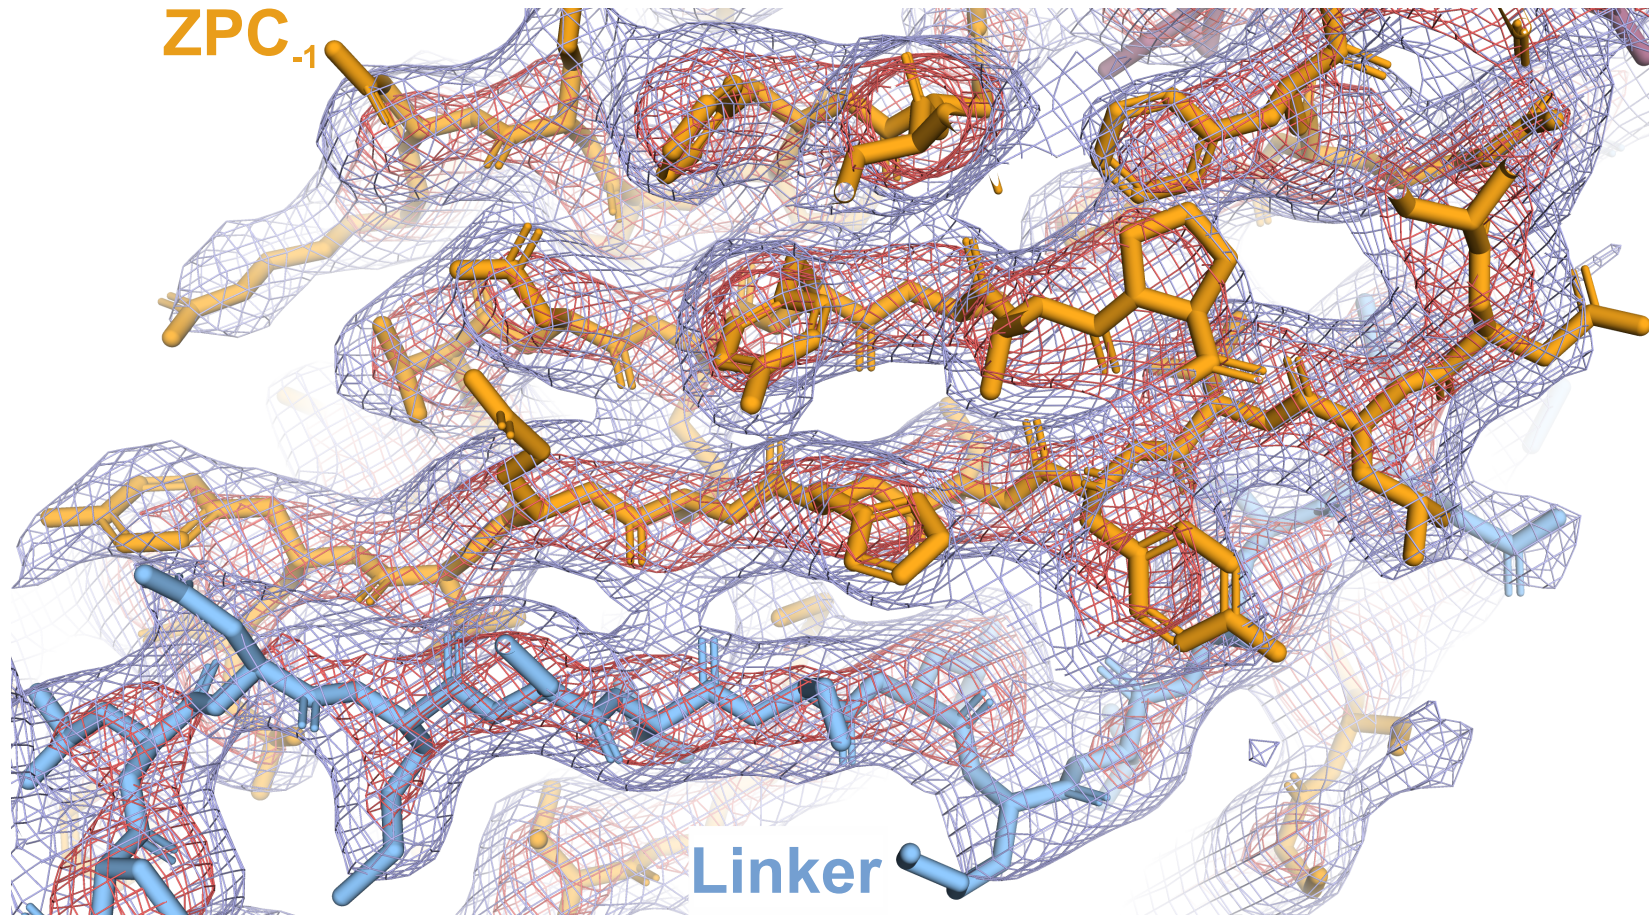

Linker

Supplement: supp [file elife-60265-supp-v1.zip]

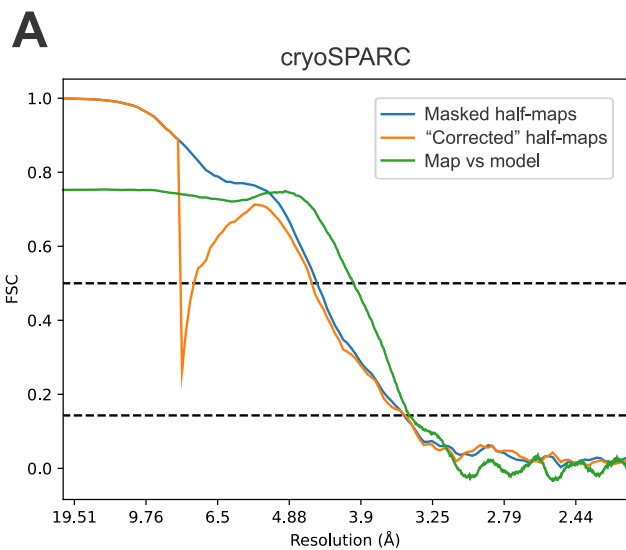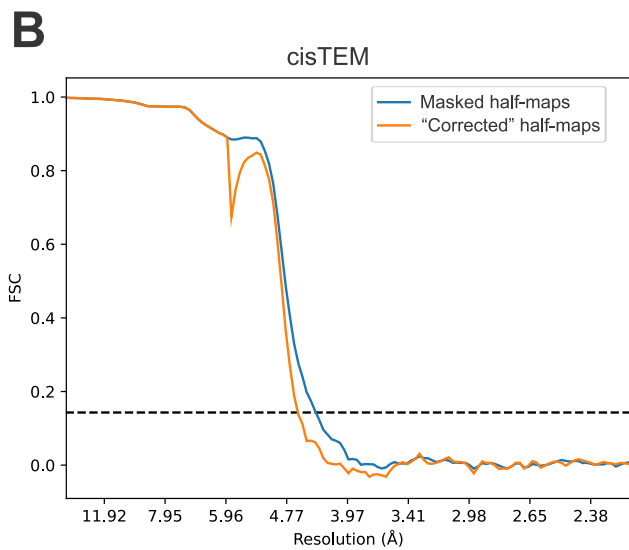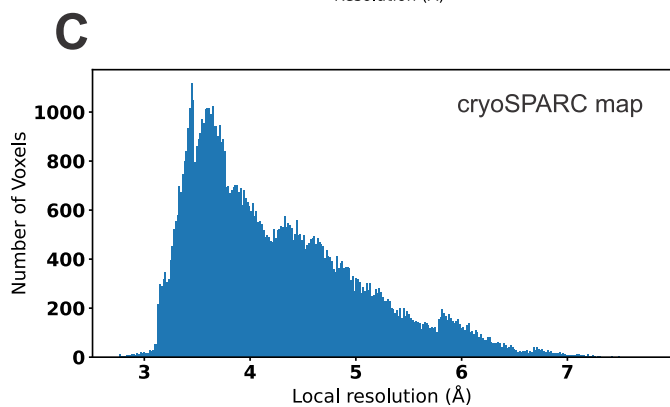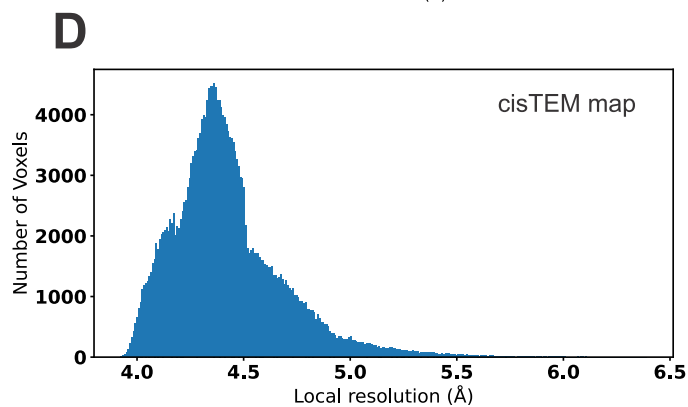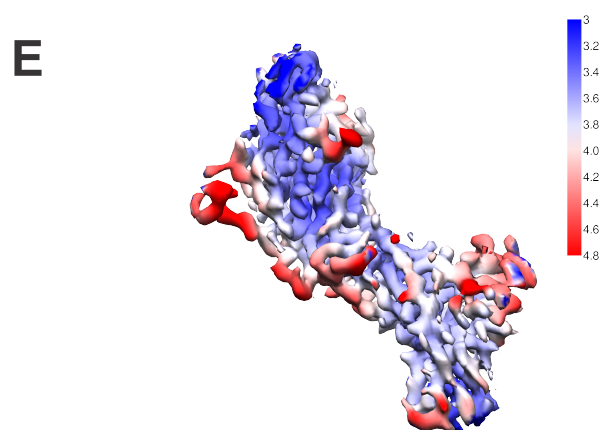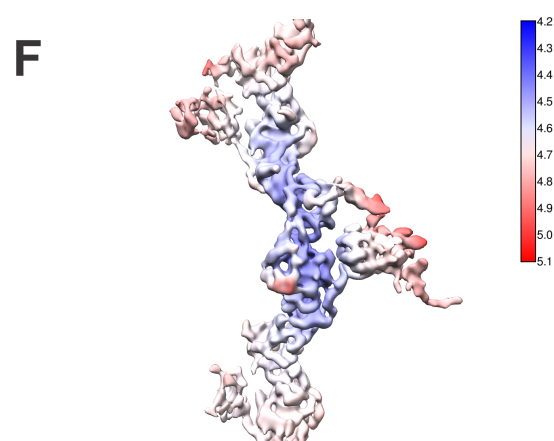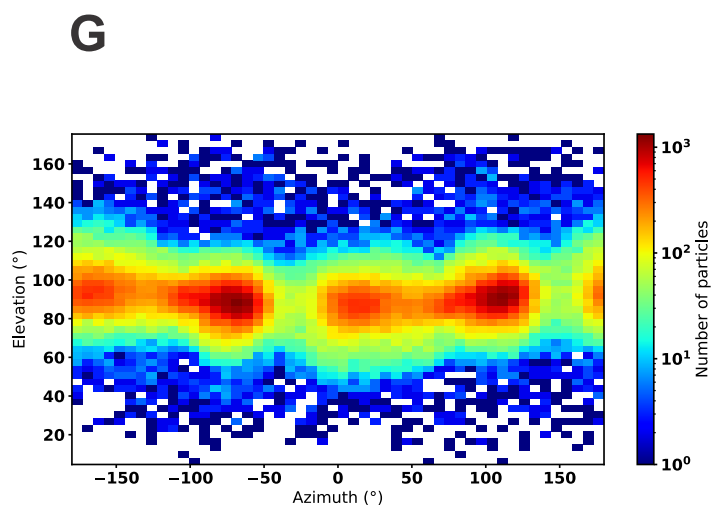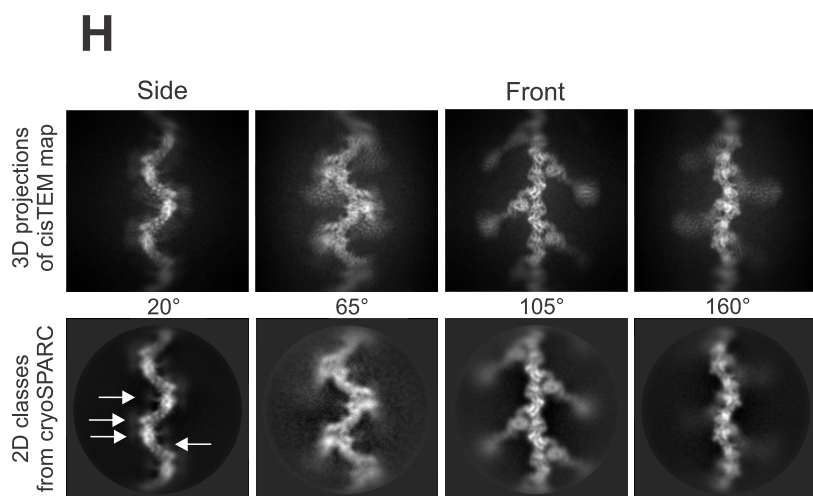

Supplement: supp [file elife-60265-supp-v1.zip]
